# Supplementary material for: Rasch analysis of the hospital anxiety and depression scale among Chinese cataract patients
Source: PubMed Central journal article supplement (PMC5614566; doi:10.1371/journal.pone.0185287), 2017-09-26
Supplement: pone.0185287.s001.pdf [file pone.0185287.s001.pdf]

**S1 Table. Uniform differential item functioning (DIF) assessed by age, sex, education.(DIF difference>1.0 logits was in bold to indicate that uniform DIF would occur.)\***

|                                                    | <b>HADS-Anxiety</b> |           |           |           |            |            | <b>HADS-Depression</b> |           |           |           |            |            |            |
|----------------------------------------------------|---------------------|-----------|-----------|-----------|------------|------------|------------------------|-----------|-----------|-----------|------------|------------|------------|
|                                                    | <b>A1</b>           | <b>A3</b> | <b>A5</b> | <b>A9</b> | <b>A11</b> | <b>A13</b> | <b>D2</b>              | <b>D4</b> | <b>D6</b> | <b>D8</b> | <b>D10</b> | <b>D12</b> | <b>D14</b> |
| <b>Age (≤70 - &gt;70)</b>                          | -0.06               | -0.07     | 0.28      | 0.16      | -0.26      | 0.03       | -0.33                  | 0.00      | -0.56     | 0.84      | 0.63       | -0.15      | -0.49      |
| <b>Sex (Male - Female)</b>                         | 0.00                | -0.05     | -0.19     | -0.12     | 0.10       | 0.23       | 0.52                   | 0.09      | -0.69     | 0.26      | -0.19      | -0.49      | 0.34       |
| <b>Education(≤Primary school - ≥Junior school)</b> | -0.38               | -0.41     | 0.69      | 0.21      | -0.31      | 0.42       | -0.23                  | 0.26      | 0.24      | -0.39     | 0.34       | -0.21      | -0.05      |

  

|                                                    | <b>HADS-Total</b> |           |           |           |            |            |           |           |           |           |            |            |
|----------------------------------------------------|-------------------|-----------|-----------|-----------|------------|------------|-----------|-----------|-----------|-----------|------------|------------|
|                                                    | <b>A1</b>         | <b>A3</b> | <b>A5</b> | <b>A9</b> | <b>A11</b> | <b>A13</b> | <b>D2</b> | <b>D4</b> | <b>D6</b> | <b>D8</b> | <b>D10</b> | <b>D14</b> |
| <b>Age (≤70 - &gt;70)</b>                          | -0.20             | -0.03     | 0.00      | -0.17     | -0.11      | -0.12      | -0.21     | 0.06      | -0.34     | 0.66      | 0.64       | -0.31      |
| <b>Sex (Male - Female)</b>                         | -0.24             | -0.21     | -0.31     | -0.42     | 0.00       | -0.08      | 0.62      | 0.18      | -0.41     | 0.26      | -0.08      | 0.37       |
| <b>Education(≤Primary school - ≥Junior school)</b> | -0.35             | -0.45     | 0.40      | 0.24      | -0.34      | 0.25       | -0.20     | 0.29      | 0.15      | -0.10     | 0.34       | -0.12      |

\*A positive DIF contrast indicates that the item is more difficult for the left-hand-listed CLASS.
