# Supplementary material for: Rasch analysis of the hospital anxiety and depression scale among Chinese cataract patients
Source: PubMed Central journal article supplement (PMC5614566; doi:10.1371/journal.pone.0185287), 2017-09-26
Supplement: pone.0185287.s002.pdf [file pone.0185287.s002.pdf]

**S2 Table. Non-uniform Differential item functioning (NUDIF) assessed by age, sex, education. (NUDIF difference > 1.0 logits was in bold to indicate that non-uniform DIF would occur.)\***

|                                                     | HADS-Anxiety |       |       |             |              |       | HADS-Depression |       |       |       |       |              |       |
|-----------------------------------------------------|--------------|-------|-------|-------------|--------------|-------|-----------------|-------|-------|-------|-------|--------------|-------|
|                                                     | A1           | A3    | A5    | A9          | A11          | A13   | D2              | D4    | D6    | D8    | D10   | D12          | D14   |
| <b>Age (≤70 - &gt;70)</b>                           |              |       |       |             |              |       |                 |       |       |       |       |              |       |
| Low ability                                         | -0.24        | -0.11 | 0.45  | 0.40        | -0.28        | -0.02 | -0.34           | -0.15 | -0.51 | 0.89  | 0.86  | -0.17        | -0.48 |
| High ability                                        | 0.42         | -0.05 | 0.43  | -0.33       | -0.36        | -0.06 | -0.28           | 0.18  | -0.76 | 0.67  | 0.34  | -0.11        | -0.54 |
| <b>Sex (Male - Female)</b>                          |              |       |       |             |              |       |                 |       |       |       |       |              |       |
| Low ability                                         | 0.22         | -0.18 | -0.25 | -0.13       | 0.11         | 0.07  | 0.50            | 0.20  | -1.00 | 0.26  | -0.12 | -0.64        | 0.36  |
| High ability                                        | -1.00        | 0.45  | -0.07 | 0.02        | -0.04        | 0.72  | 0.45            | -0.11 | -0.09 | 0.11  | -0.26 | -0.04        | -0.01 |
| <b>Education (≤Primary school - ≥Junior school)</b> |              |       |       |             |              |       |                 |       |       |       |       |              |       |
| Low ability                                         | -0.18        | -0.48 | 0.44  | -0.21       | -0.01        | 0.60  | -0.30           | 0.30  | 0.10  | -0.21 | 0.29  | -0.04        | -0.06 |
| High ability                                        | -1.00        | 0.05  | 0.61  | <b>1.14</b> | <b>-1.20</b> | 0.25  | 0.10            | 0.14  | 0.58  | -0.58 | 0.38  | -0.92        | 0.01  |
| <b>HADS-Total</b>                                   |              |       |       |             |              |       |                 |       |       |       |       |              |       |
|                                                     | A1           | A3    | A5    | A9          | A11          | A13   | D2              | D4    | D6    | D8    | D10   | D14          |       |
| <b>Age (≤70 - &gt;70)</b>                           |              |       |       |             |              |       |                 |       |       |       |       |              |       |
| Low ability                                         | -0.05        | 0.02  | 0.00  | 0.00        | -0.01        | -0.01 | 0.00            | -0.01 | -0.07 | 0.11  | 0.04  | -0.03        |       |
| High ability                                        | 0.11         | -0.21 | 0.00  | -0.14       | -0.04        | 0.00  | -0.24           | 0.14  | 0.18  | -0.09 | 0.32  | -0.03        |       |
| <b>Sex (Male - Female)</b>                          |              |       |       |             |              |       |                 |       |       |       |       |              |       |
| Low ability                                         | 0.04         | -0.28 | -0.11 | -0.38       | 0.07         | 0.09  | 0.53            | 0.09  | -0.71 | 0.24  | -0.36 | 0.28         |       |
| High ability                                        | <b>-1.17</b> | -0.02 | -0.58 | -0.52       | -0.22        | -0.64 | 0.76            | 0.41  | 0.33  | 0.18  | 0.43  | <b>1.12</b>  |       |
| <b>Education (≤Primary school - ≥Junior school)</b> |              |       |       |             |              |       |                 |       |       |       |       |              |       |
| Low ability                                         | -0.24        | -0.40 | 0.50  | 0.00        | -0.28        | 0.24  | -0.19           | 0.25  | 0.12  | -0.04 | 0.19  | 0.05         |       |
| High ability                                        | <b>-1.10</b> | -0.50 | 0.09  | 0.76        | -0.86        | 0.16  | 0.06            | 0.57  | 0.06  | 0.25  | 0.65  | <b>-1.64</b> |       |

\*A positive DIF contrast indicates that the item is more difficult for the left-hand-listed CLASS.
